## **Molecular mechanisms of angiotensin II in the kidney: emerging role in the progression of renal disease: beyond haemodynamics**

Gunter Wolf

Department of Medicine, Division of Nephrology and Osteology, University of Hamburg, Hamburg, Germany

**Key words:** chronic renal failure; compensatory hypertrophy; renin–angiotensin system; macrophages/monocytes

### **Introduction**

Franz Volhard (1872–1950), one of the most influential German clinicians in the first half of this century and probably best known for his seminal classification of nephritis [1], postulated as early as 1923 the existence of a renal-derived factor as the cause of vasospasm of the then so-called pale hypertension [2]. Hartwich, one of Volhard's disciples, demonstrated in 1930 that ligation of the renal artery in dogs caused a transient rise in blood pressure [3]. Although not widely appreciated at that time, these studies were the precursors of Goldblatt's authoritative experiments establishing that renal ischaemia causes persistent hypertension [4]. Until the work of Braun-Menéndez [5], and independently of Page [6], it was believed that a saline extract, first prepared from rabbit kidneys by Tigerstedt and Bergmann in 1898 and named renin [7], was sufficient to induce vasoconstriction. Page noticed that further purification of a crude renal preparation abolished its vasoconstrictive abilities whereas mixing of this purified renin with plasma restored the effect, suggesting that renin generates a vasoactive substance from plasma [6]. In parallel experiments, Braun-Menéndez and Fasciolo discovered that a vasoconstrictor of identical properties, as found in the venous blood from a kidney with experimentally induced renal artery stenosis, is produced by incubating renin with plasma [5]. These fundamental investigations, together with the discovery of an enzyme in plasma capable of converting vasoactive factors, later named angiotensin-converting enzyme (ACE), by Skeggs and associates [8], laid the groundwork for the many subsequent studies on the renin–angiotensin system (RAS). The synthesis of

angiotensin II (ANG II) enabled investigators to test directly the effect of this peptide on many diverse functions of the organism [9,10]. The discovery that a venom of the Brazilian viper was able to inhibit ACE and the synthesis of competitive peptide analogues of ANG II such as saralasin in the early 1970s provided the tools to interfere with the activation of the RAS [11,12]. *In vivo* binding studies in several organs including the kidney using saralasin provided convincing evidence that ANG II-receptors are heterogeneous in expression and function with high- and low-affinity binding characteristics [10,13]. The development of specific competitive non-peptide ANG II-receptor antagonists [14], whose applications confirmed the existence of at least two types of ANG II receptors, has been pivotal in the cloning of the AT<sub>1</sub> receptor in 1991 [15,16]. The AT<sub>2</sub> receptor was more recently cloned, and it is currently the last member of the RAS whose molecular structure has been identified [17].

The functions of ANG II to induce vasoconstriction and to stimulate aldosterone release from the adrenal gland were well established in the 1950s [18]. Micropuncture studies in the 1970s firmly demonstrated the role of ANG II in the regulation of glomerular haemodynamics [19,20]. In parallel, evidence accumulated that mesangial cells express ANG II receptors, contract after challenge with the octapeptide, and increase the uptake and processing of macromolecules in the presence of ANG II [21,22]. However, it became clear that ANG II effects were not limited to the glomerular circulation, and several investigators showed that the peptide modulates proximal tubular sodium and water transport [24,25].

Anderson and co-workers published their landmark study in 1985 showing that an ACE inhibitor reduced proteinuria and limited glomerular injury in rats with experimentally induced reduction of renal mass [26,27]. These beneficial effects of the ACE inhibitor were then solely attributed to the normalization of glomerular hypertension [26]. It took almost a decade until the validation that ACE inhibitors also provided protection against the progression of renal insufficiency in humans with various renal diseases [28,29]. There is strong evidence that these protective effects of the ACE

*Correspondence and offprint requests to:* Gunter Wolf MD, University of Hamburg, University Hospital Eppendorf, Department of Medicine, Division of Nephrology and Osteology, Pavilion 61, Martinistraße 52, D-20246 Hamburg, Germany.

inhibitors may also be attributable to mechanisms other than a reduction in blood pressure [28,29].

During recent years, a myriad of data has accumulated from observations in the kidney as well as other organs that ANG II exerts diverse effects such as growth stimulation, induction of fibrogenesis, and immunomodulation, which are clearly beyond the commonly appreciated classical function of this vasoactive peptide. A review describing these more recently recognized functions of ANG II has been consequently entitled 'Angiotensin actions in the kidney: renewed insight into the old hormone' [30]. An overview of some, but not all, of the newer functions of ANG II is given in Figure 1.

This revitalized interest into the vasoactive peptide emanated from different sources. First of all, the cloning of the diverse classes of ANG II receptors and the pharmacological tools to block these receptors offer the opportunity to dissect the various signal transduction pathways involved subsequent to receptor activation, and to better understand the function of ANG II on a molecular level including activation or suppression of target genes [14–16]. Although the RAS has been traditionally considered as an endocrine system with only renin being synthesized by the kidney, there is now convincing evidence that all components of a local RAS resides within the kidney and all elements of a functional RAS may be even present in proximal tubular cells [31–34]. ANG II is indeed secreted in nanomolar concentrations into the tubular fluid, and cells along the nephron come in contact with much higher concentrations of the peptide than previously thought [35]. Equally important, the local renal RAS may be independently regulated from its systemic counterpart, and commonly used systemic concentrations of ACE-inhibitors may not necessarily inactivate the renal RAS. The recent identification of new angiotensin peptides, such as angiotensin IV and angiotensin (1–7) with distinct functions and probably separate putative receptors, and the accompanying enzymatic machinery to generate these peptides as well as the previously underestimated role of ANG II metabolism

in contributing to local peptide concentrations, have added considerable complexity to the RAS [36–38]. Finally, many of the newer functions attributed to ANG II such as compensatory growth responses, stimulation of fibrogenesis, and initiation of monocyte/macrophage (M/M) influx into the kidney may be involved in the progressive loss of renal function in chronic disease [30,39–41]. Furthermore, ANG II may function as a bridge linking haemodynamic mechanisms which take place during the functional adaptation of surviving nephrons after renal injury to the associated morphological remodelling of renal architecture [40]. The current review will first describe how ANG II modulates renal growth and fibrogenesis and will then focus on potential immunomodulatory effects of the peptide. Mechanisms of ANG II-mediated changes in glomerular haemodynamics and ultrafiltration, although important in the appreciation of this peptide as a pivotal factor in the progression of renal disease, will not be covered, and have been reviewed elsewhere [42–45].

### ANG-II-mediated induction of cytokines and growth factors

Many of the diverse effects of ANG II delineated in detail below are not directly caused by the vasoactive peptide itself but are rather mediated through the ANG II-induced production of a wide array of different cytokines and growth factors [30,40,46,47]. In such a scheme, ANG II may stimulate a particular factor in a distinct renal cell. This factor, most probably but not necessarily subsequent to secretion, may then bind and activate either nearby cells in a paracrine or the same cells in an autocrine manner. Since the majority of information of ANG II potential to induce other factors is derived from culture experiments with homologous cells, the actual *in vivo* situation is much more complex and the identification of which local cytokine may be induced by ANG II is very difficult, if not impossible. An overview of the various cytokines and

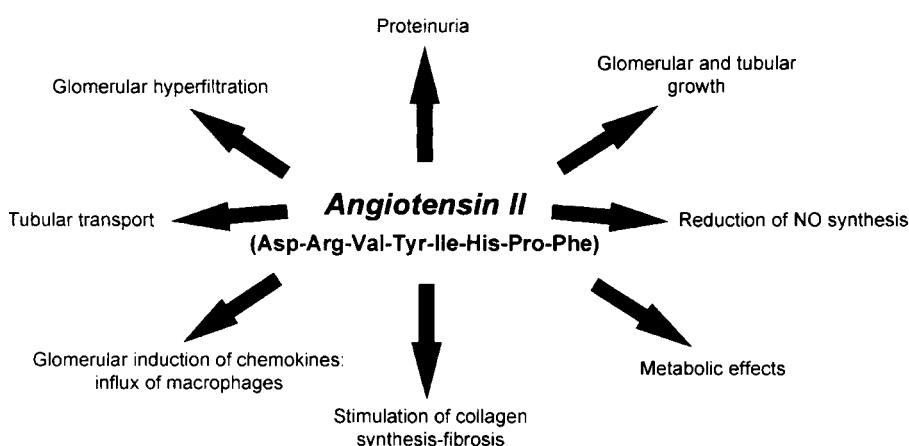

**Fig. 1.** ANG II has many recently discovered effects which may all contribute to the progression of chronic renal disease towards irreversible scarring.

growth factors induced in renal cells is provided in Table 1.

### ANG II as a renal growth factor

Although the growth-promoting effects of ANG II on vascular smooth-muscle cells have been relatively well defined [41], it was only more recently that several groups have drawn their attention to the capacity of ANG II to modify renal growth processes. Norman *et al.* were among the first to formally investigate the potential growth effects of ANG II on proximal tubular cells, describing that the octapeptide clearly potentiated proliferation induced by epidermal growth factor [48,49]. Our group was the first to demonstrate that ANG II stimulates hypertrophy of a murine proximal tubular cell line (MCT cells), as determined by stimulating protein synthesis and increased cell size without accompanying DNA synthesis [50]. We have subsequently shown that ANG II induces a hypertrophic response in LLC-PK<sub>1</sub> cells through activation of AT<sub>1</sub> receptors [51]. These findings have been confirmed in primary cultures of rabbit and rat proximal tubular cells [52,53]. Pertussis toxin and agents increasing intracellular cAMP abolished the ANG II-induced protein synthesis, indicating that the AT<sub>1</sub> receptor is coupled to adenylate cyclase by a pertussis-toxin-sensitive inhibitory G-protein [54,55–57]. Subsequent activation of cytosolic S6 kinase appears to be essential in this process [52,56]. ANG II stimulates bioactivation and expression of transforming growth factor- $\beta$  (TGF- $\beta$ ) in tubular MCT cells [58]. This ANG-II-mediated expression of TGF- $\beta$  is due to an increase in transcriptional activity [59]. A neutralizing anti-TGF- $\beta$  antibody attenuates the ANG-II-induced increase in protein synthesis in MCT cells, suggesting that the hypertrophy is mediated by synthesis and activation of endogenous TGF- $\beta$  [89]. Interestingly, transfection of MCT cells with the *c-mas* oncogene converts the hypertrophic growth response of ANG II into proliferation [60]. This change is associated with decreased TGF- $\beta$  transcription and synthesis in *c-mas* transfected cells, suggesting that ANG-II-mediated TGF- $\beta$  transcription is pivotal for the hypertrophic growth

response in proximal tubular cells [59]. Proximal tubular cells undergoing ANG-II-mediated hypertrophy are arrested in the G<sub>1</sub> phase of the cell cycle and express typical G<sub>1</sub>-phase-associated genes [50,54,57]. Induction of such G<sub>1</sub>-phase-associated early growth response genes have been also described *in vivo* after infusion of ANG II into the renal artery [61]. This G<sub>1</sub> phase arrest depends on the induction of the cyclin-dependent kinase (CdK) inhibitor p27<sup>Kip1</sup> [62]. p27<sup>Kip1</sup> expression is stimulated after incubation of LLC-PK<sub>1</sub> cells with ANG II or TGF- $\beta$  and binds to cyclin D1-Cdk4 complexes, inhibits their kinase activity, and hampers G<sub>1</sub>-phase exit [62]. In addition to G<sub>1</sub>-phase arrest and stimulation of *de novo* protein synthesis, there is also evidence, at least in LLC-PK<sub>1</sub> cells, that ANG II reduces protein degradation, suggesting that these effects are additive in the induction of tubular hypertrophy [63]. An overview of the molecular mechanisms of how ANG II induces hypertrophy of proximal tubular cells is shown in Figure 2. In contrast to proximal tubular cells, ANG II is mitogenic for a mouse cell line derived from medullary thick ascending limb of Henle's loop (mTAL) [64]. This mitogenic response is associated with failure of ANG II to stimulate TGF- $\beta$  synthesis [64], a finding that may explain the induction of a proliferative growth response in these mTAL cells.

We reported in 1992 that ANG II causes a small but significant proliferation of a murine mesangial cell line in serum-free medium in the absence of other factors [65]. Although several investigators have subsequently corroborated these findings in cultured mesangial cells from different species [66–73], not all found evidence of ANG II-mediated mitosis [74–76]. In fact it has been proposed that ANG II induces hypertrophy rather than proliferation of mesangial cells [74–76], and there may exist differences in the kinetic pattern of induction of mitogen-activated protein (MAP) kinases between strong proliferative stimuli such as platelet-derived growth factor (PDGF) and ANG II [76]. However, the differences in the growth pattern (proliferation *versus* hypertrophy) are most probably due to variance in culture conditions, addition of supplementary growth factors, species differences, and the methods used to assess proliferation. There is some evidence that ANG-II-induced proliferation of mesangial cells may be mediated by autogenous release of other cytokines such as interleukin 6, PDGF or endothelin-1 [66,67,73]. Nevertheless, infusion of this peptide into naive rats causes a small proliferation of mesangial cells [77,78], although it remains to be established whether this effect is directly generated by ANG II and not by hypertension.

Interestingly, the *in vitro* proliferative effects of ANG II on mesangial cells are inhibited in the presence of atrial natriuretic peptide (ANP) or supplementation of the medium with the nitric oxide precursor L-arginine, suggesting that an increase in intracellular cGMP inhibits mitosis [70,79]. Other effects, however, like ANP-mediated synthesis of TGF- $\beta$  may play additional roles in this process [80]. ANG-II-mediated

**Table 1.** ANG-II-mediated induction of cytokines and growth factors in various renal cells

| Factor                           | Cell type                   | Reference |
|----------------------------------|-----------------------------|-----------|
| Endothelin-1                     | Mesangial cell              | 66        |
|                                  | Glomerular endothelial cell | 82        |
| Interleukin 6                    | Mesangial cell              | 67        |
| MCP-1                            | Mesangial cell              | 136, 137  |
| Platelet-activating factor (PAF) | Mesangial cell              | 46        |
| PA-1                             | Mesangial cell              | 121       |
| PDGF                             | Mesangial cell              | 73        |
| RANTES                           | Glomerular endothelial cell | 135       |
| TGF- $\beta$                     | Proximal tubule cell        | 58        |
|                                  | Mesangial cell              | 116       |

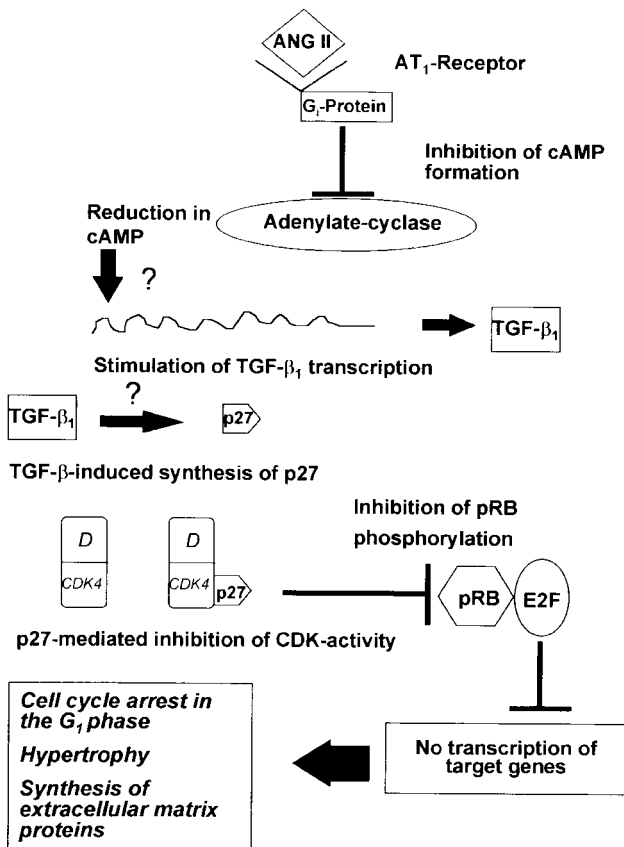

**Fig. 2.** Overview of the complex mechanisms of how ANG II may stimulate hypertrophy of cultured proximal tubular cells. After binding to AT<sub>1</sub> receptors, an inhibitory G protein leads to inhibition of adenylate cyclase, resulting in a decrease in cAMP. This decrease, in addition to other putative signal transduction pathways, may stimulate transcription and synthesis of TGF-β<sub>1</sub>. TGF-β<sub>1</sub> expression itself, as well as TGF-β-independent effects of ANG II, stimulate translation, but not transcription, of the CdK inhibitor p27<sup>Kip1</sup>. This protein associates with CdK4-cyclin D complexes and inhibits their kinase activity. The result is a decrease in phosphorylation of the protein product of the retinoblastoma gene (pRB) which retains the transcription factor E2F. The lack of transcription of various target genes (which are different from immediate early genes being induced by ANG II) facilitates cell cycle arrest in the G<sub>1</sub> phase, with resultant hypertrophy. This arrest as well as direct effects of TGF-β<sub>1</sub> stimulate protein synthesis including extracellular matrix proteins. ← indicates stimulation; ⊥ refers to inhibition; ? marks potential mechanisms which have not yet been tested.

proliferation has been also described in rat renomedullary interstitial and glomerular endothelial cells [81,82].

ACE inhibitors partly attenuate compensatory renal growth in different models, independently of concomitant haemodynamic changes [30,40,83–85]. For example, a high dose of enalapril abolished compensatory renal hypertrophy and glomerular sclerosis better than a low dose of this ACE inhibitor in subtotal nephrectomized rats, despite a similar reduction in glomerular capillary hydraulic pressure [86]. Treatment of weaning rats for 6 weeks with frusemide activates the RAS and stimulates tubular and glomerular hypertrophy as measured by morphometry [87]. Treatment with enalapril prevents this compensatory renal hypertrophy [87]. Amann and co-workers [78]

showed in a subtotal nephrectomy model in rats that only ACE inhibitors, but not other antihypertensive drugs, prevented mesangial proliferation and podocyte hypertrophy despite comparable reduction in systolic blood pressure. Although this finding may not rule out a potential protective effect of ACE-inhibitor-mediated reduction in glomerular haemodynamics, these investigators persuasively showed that the beneficial effects of interference with the RAS are not caused by a decrease in hypertension.

A strong activation of the RAS occurs in the kidney during fetal and early postnatal life, resulting in high levels of ANG II [88–90]. Inhibition of the RAS causes an arrest in nephrovascular maturation and in renal growth and development [88]. Moreover, mice deficient in ACE exhibit abnormal vessels and tubules [91,92]. Although not supported by data from some investigators [93], these findings suggest that ANG II may be an important factor in nephrogenesis and renal maturation and growth.

Studies performed in coronary endothelial cells and rat pheochromocytoma cells which both express the AT<sub>2</sub> subtype of the ANG-II receptor suggest that engagement of ANG II with this receptor inhibits cell proliferation [94]. Along this line, further studies indicate that activation of the AT<sub>2</sub> receptors exerts anti-proliferation by increasing programmed cell death (apoptosis) through activation of a protein-tyrosine-phosphatase [95]. This activation leads to an under-phosphorylation and inhibition of Bcl-2 protein, a key factor preventing apoptosis [95]. Despite this fascinating result and the potential therapeutic effect of over-expressing AT<sub>2</sub> receptors, there is currently little information that similar mechanisms are operative in the kidney [82,97].

## Profibrogenic role of ANG II

End-stage kidneys, independent of the primary renal disease, are characterized by the irreversible development of glomerulosclerosis and tubulointerstitial fibrosis [98,99]. Net accumulation of extracellular matrix proteins in the glomerular tuft and/or the tubulointerstitium is the result of an increase in the synthesis of these substances, a decrease in turnover, or a combination of both [98,99]. Although a wide variety of diverse factors including systemic and glomerular hypertension, proteinuria, metabolic factors such as acidosis, and influx of circulating monocytes may all contribute to the fibrogenic process in end-stage kidneys, there is increasing evidence that many of these factors induce profibrogenic cytokines such as TGF-β, which in turn stimulates production and inhibits turnover of extracellular matrix proteins [100]. Moreover, in the dynamic mechanisms of fibrogenesis, growth processes such as proliferation of intrinsic glomerular cells and compensatory tubular hypertrophy may precede the later development of glomerulosclerosis and tubulointerstitial fibrosis [101–104]. Consequently, potential effects of ANG II on synthesis and turnover of extracellular

matrix have been investigated, mainly in cultured proximal tubular and mesangial cells. ANG II stimulates transcription of collagen type IV in MCT cells [55]. This stimulation is mediated by endogenous synthesis and autocrine action of TGF- $\beta$  because a neutralizing anti-TGF- $\beta$  antibody as well as TGF- $\beta$  antisense oligonucleotides attenuate ANG II-induced collagen type IV transcription and synthesis [105].

More indirect evidence that ANG II plays an important role in tubulointerstitial fibrosis *in vivo* has been obtained from comprehensive studies in rats with unilateral ureteral ligation [106–108]. Tubular TGF- $\beta$  expression precedes the development of tubulointerstitial fibrosis and was partly attenuated when animals were treated with an ACE inhibitor [106,107]. Enalapril administration reduces TGF- $\beta$  expression and halts tubulointerstitial fibrosis even when the drug is given later during the course of obstructive nephropathy [108]. Another model in which a close relationship between activated RAS, TGF- $\beta$ , and the subsequent development of tubulointerstitial fibrosis has been appreciated is chronic cyclosporin nephrotoxicity. Administration of cyclosporin to animals as well as direct treatment of cultured proximal tubular cells stimulates expression of TGF- $\beta$  and collagen synthesis [109–112]. Treatment of rats with enalapril or an AT<sub>1</sub>-receptor antagonist prevents cyclosporin-induced TGF- $\beta$  and  $\alpha_1(I)$ procollagen mRNA expression as well as tubulointerstitial fibrosis, convincingly demonstrating that ANG II induces TGF- $\beta$ , which in turn activates extracellular matrix synthesis [113,114]. Enalapril, but not a calcium antagonist, also attenuates tubulointerstitial fibrosis in ageing mice of 2 years [115].

In addition, ANG II stimulates fibronectin and collagen type I synthesis in cultured mesangial cells [65,71,72]. It appears that some of these changes are also mediated by secondary effects of induced TGF- $\beta$  [116]. ANG II induced mesangial-cell activation of the cyclic adenosine monophosphate response element binding protein (CREB) transcription factor, whose activation seems to be a necessary prerequisite for fibronectin transcription [117]. After subtotal nephrectomy, rats develop glomerulosclerosis and tubulointerstitial fibrosis, leading to impairment of renal function [118]. These changes are associated with a 2.5-fold increase in TGF- $\beta$  gene expression, localized to sclerotic glomeruli and areas of tubulointerstitial damage [118]. Administration of the ACE inhibitor ramipril and the AT<sub>1</sub>-receptor blocker valsartan blunt the increase in TGF- $\beta$  mRNA and attenuate the structural manifestations of injury, indicating an *in vivo* relationship between RAS, TGF- $\beta$ , and subsequent development of renal scarring [118]. In a separate study, even delayed ACE treatment started 8 weeks after 5/6 nephrectomy reduces glomerulosclerosis compared to untreated rats [119]. Lee *et al.* [120] have also provided clear evidence in a model of progressive glomerulosclerosis that endothelial and mesangial RAS is essential in TGF- $\beta$  induction and subsequent synthesis of extracellular matrix proteins.

Complementary to ANG-II-stimulated increase in extracellular matrix proteins, recent findings indicate that the peptide also modulates the plasmin protease system [121–124]. Plasmin degrades extracellular matrix itself and additionally activates metalloproteinases which further degrade collagens. Plasmin synthesis itself is regulated by the balance between plasminogen activators (PA) and their inhibitors (PAI-1,2). Kagami *et al.* [121] have recently demonstrated in cultured rat mesangial cells that ANG II upregulates PAI-1 production, partly through induction of TGF- $\beta$ . ANG-II-mediated expression of PAI-1 depends on activation of protein kinase C. [122]. Since PAI-1 is an inhibitor of plasmin-mediated extracellular matrix degradation, ANG-II-mediated PAI-1 induction may contribute to the development of renal fibrosis [124]. Surprising recent studies disclosed that renin may also bind directly to mesangial cells and increases PAI-1 expression [123]. *In vivo* studies utilizing a model of radiation-induced glomerulosclerosis have shown a decrease in PAI-1 expression when animals were treated with ACE inhibitor or AT<sub>1</sub>-receptor blocker [124]. This PAI decrease was associated with accelerating fibrinolysis, suggesting that ANG II may indeed accelerate renal fibrosis through interaction with protease systems [124].

Probably the most direct evidence that the RAS is involved in renal scarring may stem from investigations designed to overexpress renin and angiotensinogen locally in rat glomeruli by using haemagglutinating virus of Japan [125]. Seven days after transfection, extracellular matrix was expanded and  $\alpha$ -smooth-muscle actin was expressed in mesangial cells [125]. No significant difference in the blood pressure was observed between the different groups, indicating that systemic hypertension did not contribute to the glomerulosclerosis in renin-angiotensinogen overexpressing glomeruli.

## Immunomodulatory effects of ANG II

Glomerular and interstitial infiltration with M/M is a common feature in many immune-mediated and non-immune-mediated renal diseases, and it is believed that this infiltration is crucial in the progression of renal disease [126]. Diamond and Anderson [127] treated rats with experimentally induced chronic aminonucleoside nephrosis with the ACE inhibitor enalapril and observed a decrease in tubulointerstitial cellular infiltrates and in the development of interstitial fibrosis compared with untreated controls. An infiltration of M/M has been reported in the unclipped kidneys of rats with two-kidney one-clip hypertension, a classical model of an initially strongly activated RAS [128,129]. ACE inhibitor or AT<sub>1</sub> treatment also reduces renal M/M in uninephrectomized spontaneously hypertensive rats (SHR) [130]. Although these effects could be due to a reduction of proteinuria and normalization of glomerular hyperfiltration, they may additionally indicate the tantalizing possibility that ANG II exerts

immunomodulatory properties by promoting renal M/M influx. Indeed studies more than a decade ago suggest that the peptide may have chemotactic activity for various immunocompetent cells. It has been reported, for example, that ANG II stimulates the chemotactic response of human mononuclear cells *in vitro* [131], and activates phagocytosis of granuloma-derived macrophages [132]. Farber *et al.* [133] showed that ANG II influences neutrophil accumulation via production of chemoattractant activity by vascular endothelial cells. However, this neutrophil chemoattractant was not further identified, but it was implied that it is not identical with known eicosanoids [133]. More recent studies have demonstrated that ANG II induces adhesion of M/M, but not of neutrophils, to aortic endothelial cells without upregulation of adhesion molecules [134].

We have studied in a recent series of experiments whether ANG II may modulate M/M recruitment in the kidney [135]. ANG II dose-dependently stimulated mRNA and protein expression of RANTES, a member of the C-C chemokine subfamily with chemoattractant properties for M/M, eosinophil, and basophil granulocytes as well as T cells, in cultured glomerular endothelial cells of the rat (GER), but not in syngeneic mesangial cells [135]. Chemotactic assays revealed that the produced RANTES and not ANG II itself was actually chemotactic for human monocytes. Surprisingly, the ANG II-stimulated RANTES expression was transduced by AT<sub>2</sub> and not AT<sub>1</sub> receptors [135]. Intraperitoneal infusion of ANG II (500 ng/h) into normal rats for 4 days significantly stimulated glomerular RANTES mRNA and protein expression [135]. Immunohistochemistry revealed induction of RANTES protein mainly in glomerular endothelial cells and small capillaries (see Figure 3A,B). ANG-II-infused animals demonstrated an increase in glomerular M/M staining, an effect attenuated by oral treatment with an AT<sub>2</sub>-receptor blocker [135]. These studies demonstrated that ANG II may play an important role in glomerular chemotaxis of M/M through the local induction of the chemokine RANTES in endothelial cells. The astonishing observation that the ANG-II-mediated induction of RANTES is transduced by AT<sub>2</sub> rather than AT<sub>1</sub> receptors may influence the decision as to which substances should be used for the therapeutic interference with the RAS. However, RANTES may not be the only chemokine whose expression is induced by ANG II in the kidney. Preliminary reports from two independent groups suggest that ANG II stimulates monocyte chemoattractant protein-1 (MCP-1) expression in cultured mesangial cells [136,137]. Since reactive oxygen intermediates have been recently implicated in transcription of MCP-1 by the transcription factor family of NF- $\kappa$ B [138], and ANG II may induce and support the generation of such reactive oxygen species [139], at least in some tissues this pathway offers an interesting explanation of how the peptide could stimulate MCP-1 expression. Since nitric oxide (NO), whose tubular synthesis is impaired by ANG II [140], inhibits NF-

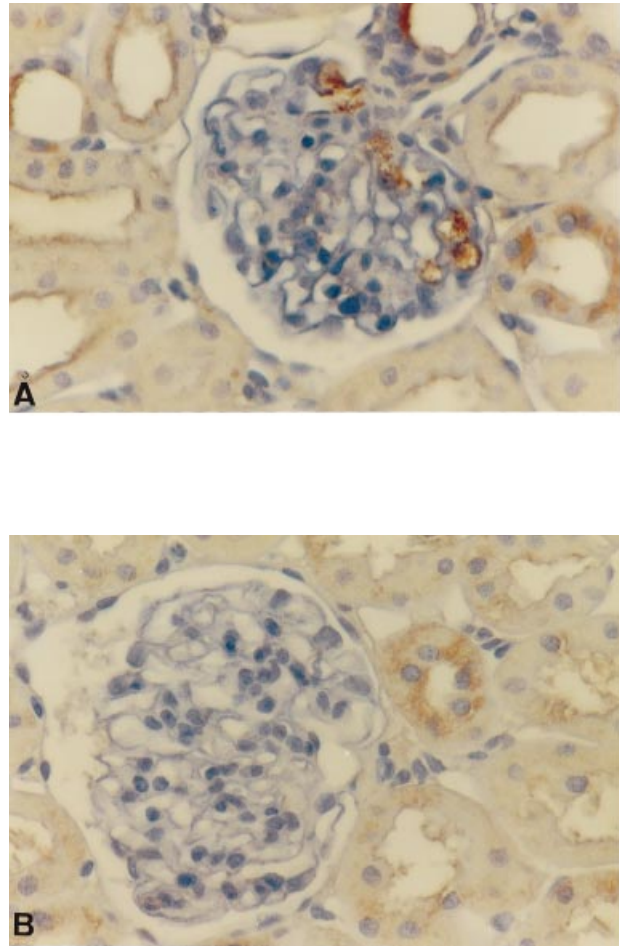

**Fig. 3 A, B.** Evidence for immunoregulatory effects of ANG II *in vivo*. **A.** Kidney section of a rat infused for 4 days with ANG II showed positive staining for chemokine RANTES, mainly in glomerular endothelial cells. **B.** Rats infused with solvent (no ANG II) revealed only a slight staining of tubular cells with no detection of RANTES protein in the glomerular tuft. Magnification  $\times 200$ . For details see reference 135.

$\kappa$ B DNA binding [141], an ANG II-mediated reduction in NO may attenuate this negative feedback mechanism and further facilitate MCP-1 transcription.

We have addressed in a very recent study the effect of two AT<sub>1</sub>-receptor antagonists, losartan and irbesartan, on glomerular MCP-1 expression as well as influx of M/M in a model of mesangioproliferative nephritis induced in rats by injection of an anti-thy 1 antibody [142]. Both AT<sub>1</sub>-receptor antagonists caused a significant, but not total, reduction of MCP-1 mRNA and protein expression 24 h after injection of antithymocyte serum. Treatment with losartan or irbesartan also reduced chemotactic activity of isolated glomeruli from nephritic animals [142]. Quantification of ED1-positive cells revealed that losartan as well as irbesartan reduced glomerular M/M infiltration in nephritic rats by approximately 30–50% [142]. These data indicate that short-term antagonism of AT<sub>1</sub> receptors abolished the early glomerular MCP-1 expression and M/M influx

in a model of experimentally induced glomerulonephritis.

After loss of functional renal tissue, surviving proximal tubules have to increase their acid secretion through enhanced bicarbonate reabsorption and generation of ammonia to maintain acid–base homeostasis [143]. This response is partly mediated by ANG-II-induced stimulation of ammoniogenesis [144]. Such an increase in ammonia production may lead to the activation of complement C3, provoking further the influx of M/M into the kidney [145].

Osteopontin is an arginine–glycine–aspartate-rich protein recently shown to induce M/M influx [146]. A marked increase in osteopontin expression was observed in distal tubule and collecting ducts of ANG-II-infused rats, preceding other pathological changes [146]. These observations may suggest that ANG-II-induced osteopontin overexpression facilitates M/M accumulation at the sites of tubulointerstitial injury.

Provocative recent studies demonstrated renin and ANG II expression in M/M [147,148]. ANG II release from infiltrating M/M may, on the one hand, further stimulate chemoattraction of these cells, but may, on the other, additionally influence renal haemodynamic, growth and fibrogenic processes through a local increase in ANG II. A preliminary report suggests that ANG II augments anti-CD3-antibody-induced proliferation of a murine nephritogenic T cell clone [149]. This clonal expansion was transduced through AT<sub>1</sub> receptors [149]. These compelling studies indicate that ANG II may foster expansion of nephritogenic T cells.

### **What does this all mean for the treatment of renal patients?**

After elaborating in detail on the myriad of ANG II effects in the kidney, one may ask how does this cause any paradigm change in the clinical treatment of patients with chronic renal disease. Patients suffering from diabetic nephropathy were among the first to be treated with ACE inhibitors after the landmark experimental studies by Anderson and co-workers showed a protective effect of these drugs on renal function [150,151]. Many studies have since convincingly demonstrated the protective effects of ACE inhibitors in the prevention of diabetic nephropathy [152–156]. In addition, several studies are also completed indicating that various ACE inhibitors prevent the progression of chronic renal failure in patients with different primary renal diseases [28,29,157,158]. Patients suffering from autosomal dominant cystic kidney disease may be the exception [29]. Almost all studies indicate that this beneficial effect of ACE inhibitors is independent of a reduction in blood pressure [28,29,150–158]. Although some critical voices have been raised suggesting that bias may prevent the publication of negative studies [159], which exist, I nevertheless believe that there is no doubt that ACE inhibitors effectively attenuate the loss of function in chronic renal disease. However, which patients should be treated? A recent

study suggests that patients with chronic nephropathies and a proteinuria  $\geq 3$  g/24 h derive the most benefit from ACE-inhibitor treatment [158]. Other studies found also a protective effect in patients with lesser proteinuria [28,29]. A specific high-risk group in which ACE inhibitors may be less effective are patients with the ACE DD genotype, although the significance of this genotype is currently the subject of intensive research and is heavily disputed. It may be wise to look at the evolution of ACE-inhibitor treatment in diabetic patients. Initially, only diabetic patients with hypertension and proteinuria have been treated [150]. Subsequently, a protective effect of ACE inhibitors has been documented in normotensive diabetics with microalbuminuria [152]. Quite recently the EUCLID study demonstrated protective effects of ACE-inhibitor treatment on the progression of renal disease in patients with early stages of diabetes mellitus, even in the absence of microalbuminuria and hypertension, although the greatest clinical effect was observed in those with microalbuminuria [153]. This change in the treatment strategy in diabetes mellitus may serve as a model of how patients with other chronic renal diseases should be treated. Eventually all patients might be treated after the diagnosis of chronic renal insufficiency is made, irrespective of concomitant hypertension or proteinuria. Therefore ACE inhibitors could be ultimately considered as renoprotective drugs.

The recent introduction of AT<sub>1</sub>-receptor blockers as antihypertensive drugs has opened new avenues to how the effects of ANG II may be more specifically antagonized, and the theoretical advantages of this new class of drugs over ACE-inhibitors have been reviewed [160–162]. So far, at least in animal models, AT<sub>1</sub>-receptor antagonists are comparable to ACE inhibitors in their protection of renal structure [163–166]. Although AT<sub>1</sub>-receptor antagonists may have fewer bradykinin-mediated side-effects, such as cough, than ACE inhibitors [167], whether these substances are superior to ACE inhibitors in the slowing of renal function deterioration in humans, similar to findings reported in the extremely controversial ELITE study in patients with myocardial infarction, is the subject of ongoing investigations [168]. However, some experimental observations suggest that unopposed binding of ANG II to AT<sub>2</sub> receptor initiate proinflammatory responses in the kidney [135].

### **Conclusion**

ANG II has emerged as a multifunctional factor exhibiting such diverse actions as influencing renal haemodynamics and tubular transport, acting as a growth factor and a profibrogenic cytokine, and even having inflammatory properties. Cell-culture studies have provided clear evidence that many of these functions are independent of haemodynamic changes and may be pivotally involved in the progression of chronic renal disease. Naturally the contribution of such non-haemodynamic effects *in vivo* is much more complica-



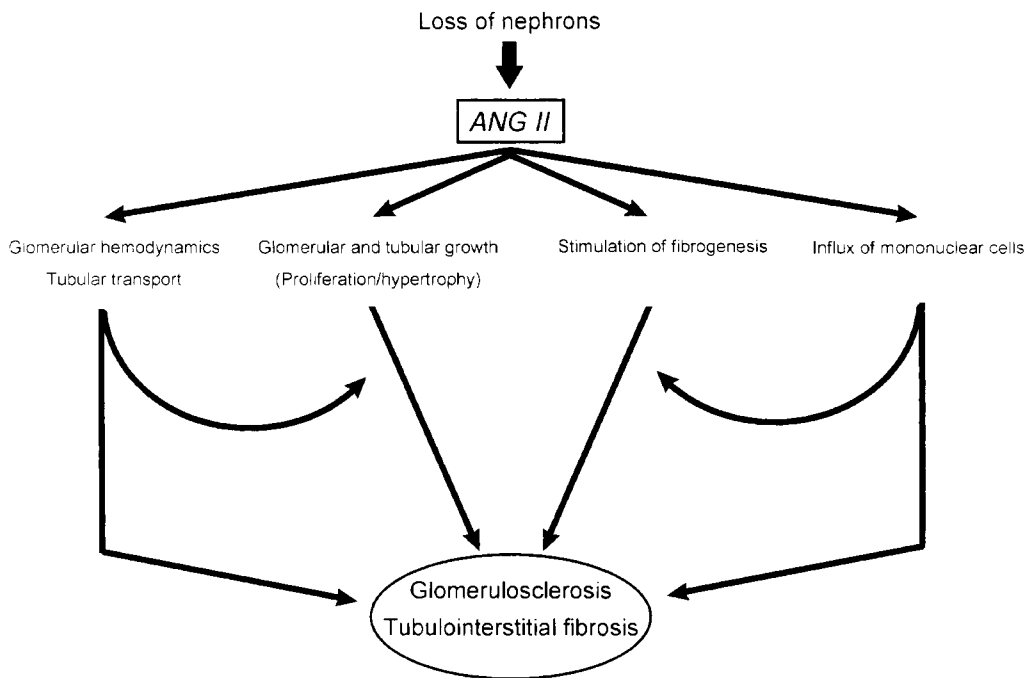

**Fig. 4.** Integrative concept of how haemodynamic as well as non-haemodynamic effects of ANG II may jointly contribute to the development of glomerulosclerosis and tubulointerstitial fibrosis. After loss of functioning renal tissue, a local and/or systemic activation of the RAS occurs, resulting in an increase in ANG II levels. On the one hand, ANG II modulates the adaptive haemodynamic changes such as increasing glomerular hydraulic pressure and tubular reabsorption to maintain fluid and electrolyte homeostasis; on the other, ANG II stimulates compensatory glomerular and tubular growth processes. The octapeptide also stimulates fibrogenesis by increasing extracellular matrix synthesis and reduction in turnover of these proteins. Part of this profibrogenic effect of ANG II may be mediated by the induction of TGF- $\beta$ . Finally, ANG II may facilitate recruitment of monocytes into the kidney through complement activation and induction of chemoattractants such as MCP-1, RANTES, and osteopontin. These diverse actions of ANG II are closely interrelated: mechanical stretch caused by glomerular hyperfiltration or a stimulated proximal tubular reabsorption of solutes may initiate or enhance compensatory growth processes. Infiltrating monocytes release various cytokines, growth factors and toxic oxygen products which may all further promote fibrogenesis. All these diverse actions of ANG II may eventually give rise to the irreversible structural changes of glomerulosclerosis and tubulointerstitial fibrosis, which are the common endpoints of all chronic renal diseases. Taking into account the pivotal role of ANG II in these processes, it is obvious that therapeutic interventions to antagonize ANG II may slow the development of end-stage renal disease.

ated to assess, and it may ultimately be impossible to dissect haemodynamic from other effects of ANG II in the whole organism. However, haemodynamic effects, for example glomerular stretch, may further augment non-haemodynamic actions of ANG II such as renal growth or fibrogenesis [169]. The connection between haemodynamic and non-haemodynamic actions of ANG II jointly contributing to the development of renal scarring are schematized in Figure 4. Experimental investigations as well as clinical studies have provided clear evidence that ACE inhibitors slow the loss of renal function in various diseases. Although such effects may be partly due to the normalization of glomerular hyperfiltration and the reduction of proteinuria, it is wise to assume that interference with the multiple actions of ANG II, as described above, may contribute to the renoprotective capacity of ACE inhibitors. Franz Volhard, who assumed the existence of ANG II based almost exclusively on clinical observations, and who envisioned so many things in advance, would not be surprised at all.

*Acknowledgements.* I thank Fuad N. Ziyadeh MD, University of Pennsylvania, Philadelphia, USA, for a critical reading of this manuscript, helpful discussions, and the pleasant co-operation in

various projects over recent years. I also thank Eric G. Neilson MD, University of Pennsylvania, Philadelphia, USA, in whose laboratory I had the chance as a postdoctoral fellow to develop the concept of ANG II as a growth and profibrogenic factor. I am very much indebted to Rolf A. K. Stahl MD, University of Hamburg, for his continuous interest and support of my work and a critical reading of the present manuscript. I thank John Tomaszewski MD, University of Pennsylvania, Philadelphia, USA, for help with the immunohistochemical studies provided in Figure 3. Original work in the author's laboratory was supported by grants of the Deutsche Forschungsgemeinschaft and the Werner Otto-Stiftung, Hamburg.

## References

- Luft FC, Dietz R. Franz Volhard in historical perspective. *Hypertension* 1993; 22: 253–256
- Volhard F. Der arterielle Hochdruck. *Verh Dtsch Ges Inn Med* 1923; 35: 134–184
- Kronschwitz C. *Franz Volhard. Leben und Werk*. Sinemis Verlagsgesellschaft, Frankfurt am Main, 1997; 184–192
- Goldblatt PJ. The Goldblatt experiment. A conceptual paradigm. In: Laragh JH, Brenner BM, eds. *Hypertension: Pathophysiology, Diagnosis, and Management*. Raven Press, New York, 1990; 21–32
- Fasciolo JC. The experimental observation that led to discovery of angiotensin. *Hypertension* 1990; 16: 194–198
- Page IH. Hypertension research. A memoir 1920–1960. *Hypertension* 1990; 16: 199–200



7. Tigerstedt R, Bergmann PG. Niere und Kreislauf. *Scand Arch Physiol* 1898; 8: 223–271
8. Skeggs LT. Discovery of the two angiotensin peptides and the angiotensin-converting enzyme. *Hypertension* 1993; 21: 259–260
9. Bumpus FM, Schwarz H, Page IH. Synthesis and pharmacology of the octapeptide angiotenin. *Science* 1957; 125: 886–887
10. Wolf G, Neilson EG. From converting enzyme inhibition to angiotensin II receptor blockade: new insight on angiotensin II receptor subtypes in the kidney. *Exp Nephrol* 1996; 4 [Suppl. 1]: 8–19
11. Bakhle YS. Conversion of angiotensin I to angiotensin II by cell-free extracts of dog lung. *Nature* 1968; 220: 919–921
12. Plas DI, Masucci FD, Sipos F, Denning GS. Specific competitive antagonists of the vascular action of angiotensin II. *Circ Res* 1971; 29: 664–672
13. Douglas JG. Angiotensin II receptor subtypes of the kidney cortex. *Am J Physiol* 1987; 253: F1–F7
14. Timmermanns PB, Carini DJ, Chiu AT *et al*. Angiotensin II receptor antagonists. From discovery to antihypertensive drugs. *Hypertension* 1991; 18 [Suppl. 3]: III136–III142
15. Murphy TJ, Alexander RW, Griendling KK, Runge MS, Bernstein KE. Isolation of a cDNA encoding the vascular type-1 angiotensin II receptor. *Nature* 1991; 351: 233–236
16. Sasaki K, Yamano Y, Badrhan S *et al*. Cloning and expression of a complementary DNA encoding a bovine adrenal angiotensin II type-I receptor. *Nature* 1991; 351: 230–233
17. Mukoyama M, Nakajima M, Horiuchi M, Sasamura H, Pratt RE, Dzau VJ. Expression cloning of type 2 angiotensin II receptor reveals a unique class of seven-transmembrane receptors. *J Biol Chem* 1993; 268: 24539–24542
18. Laragh JH, Angers M, Kelly WG, Lieberman S. Hypotensive agents and pressor substances. The effect of epinephrine, norepinephrine, angiotensin II and others on the secretory rate of aldosterone in man. *JAMA* 1960; 174: 234–240
19. Myers BD, Deen WM, Brenner BM. Effects of norepinephrine and angiotensin II on the determinants of glomerular ultrafiltration and proximal tubule fluid reabsorption in the rat. *Circ Res* 1975; 37: 101–110
20. Blantz RC, Konnen KS, Tucker BJ. Angiotensin II effects upon the glomerular microcirculation and ultrafiltration coefficient of the rat. *J Clin Invest* 1978; 61: 910–921
21. Ausiello DA, Kreisberg JJ, Roy C, Karnovsky MJ. Contraction of cultured rat glomerular cells of apparent mesangial origin after stimulation with angiotensin II and arginine vasopressin. *J Clin Invest* 1980; 65: 174–177
22. Sterzel RB, Rupperecht HD. Glomerular mesangial cells. In: Neilson EG, Couser WG, eds. *Immunologic Renal Diseases*. Lippincott-Raven, Philadelphia, 1997; 595–626
23. Harris PJ, Young JA. Dose-dependent stimulation and inhibition of proximal tubular sodium reabsorption by angiotensin II in the rat kidney. *Pflügers Arch* 1977; 367: 295–297
24. Schuster VL, Kokko JP, Jacobson HR. Angiotensin II directly stimulates sodium transport in rabbit proximal convoluted tubules. *J Clin Invest* 1984; 73: 507–515
25. Cogan MG. Angiotensin II: a powerful controller of sodium transport in the early proximal tubule. *Hypertension* 1990; 15: 451–458
26. Anderson S, Meyer TW, Rennke HG, Brenner BM. Control of glomerular hypertension limits glomerular injury in rats with reduced renal mass. *J Clin Invest* 1985; 76: 612–619
27. Anderson S, Rennke HG, Brenner BW. Therapeutic advantage of converting enzyme inhibitors in arresting progressive renal disease associated with systemic hypertension in the rat. *J Clin Invest* 1986; 77: 1993–2000
28. Hannedouche T, Landais P, Goldfarb B *et al*. Randomised controlled trial of enalapril and  $\beta$  blockers in non-diabetic chronic renal failure. *Br Med J* 1994; 309: 833–837
29. Maschio G, Alberti D, Janin G *et al*. Effect of the angiotensin-converting-enzyme inhibitor benazepril on the progression of chronic renal insufficiency. *N Engl J Med* 1996; 334: 939–945
30. Ichikawa I, Harris RC. Angiotensin actions in the kidney: renewed insight into the old hormone. *Kidney Int* 1991; 40: 583–596
31. Burns KD, Homma T, Harris RC. The intrarenal renin-angiotensin system. *Semin Nephrol* 1993; 13: 13–30
32. Taugner R, Hackenthal E, Helmchen U *et al*. The intrarenal renin angiotensin system. *Klin Wochenschr* 1982; 60: 1218–1222
33. Wolf G, Neilson EG. Angiotensin II as a renal cytokine. *News Physiol Sci* 1994; 9: 40–42
34. Wolf G, Ziyadeh FN. Renal tubular hypertrophy induced by angiotensin II. *Semin Nephrol* 1997; 17: 448–454
35. Seikaly MG, Arrant BS, Seney FD. Endogenous angiotensin concentrations in specific intrarenal fluid compartments of the rat. *J Clin Invest* 1990; 86: 1352–1357
36. Czekalski S, Chansel D, Vandermeersch S, Ronco P, Ardaillou R. Evidence for angiotensin IV receptors in human collecting duct cells. *Kidney Int* 1996; 50: 1125–1131
37. Kohara K, Brosnihan KB, Chappell MC, Khosla MC, Ferrano CM. Angiotensin-(1–7). A member of circulating angiotensin peptides. *Hypertension* 1991; 17: 131–138
38. Wolf G, Mentzel S, Assmann KJM. Aminopeptidase A: a key enzyme in the intrarenal degradation of angiotensin II. *Exp Nephrol* 1997; 5: 364–369
39. Wolf G. Regulating factors of renal tubular hypertrophy. *Clin Invest* 1993; 71: 867–870
40. Wolf G. Angiotensin as a renal growth promoting factor. In: Mukhopadhyay SK, Raizada MK, eds. *Tissue renin-angiotensin systems*. Plenum Press, New York, 1995; 225–236
41. Berk BC, Vekshtein V, Gordon HM, Tsuda T. Angiotensin II-stimulated protein synthesis in cultured vascular smooth muscle cells. *Hypertension* 1989; 13: 305–314
42. Carmines PK, Fleming JT. Control of the renal microvasculature by vasoactive peptides. *FASEB J* 1990; 4: 3300–3309
43. Navar LG, Rosivall L. Contribution of the renin-angiotensin system to the control of intrarenal hemodynamics. *Kidney Int* 1984; 25: 857–868
44. Zatz R. Haemodynamically mediated glomerular injury: the end of a 15-year-old controversy? *Curr Opin Nephrol Hypertens* 1996; 5: 468–475
45. Gansevoort RT, de Zeeuw D, de Jong PE. Is the antiproteinuric effect of ACE inhibition mediated by interference in the renin-angiotensin system? *Kidney Int* 1994; 45: 861–867
46. Neuwirth R, Satriano JA, DeCandido S, Clay K, Schlondorff D. Angiotensin II causes formation of platelet activating factor in cultured rat mesangial cells. *Circ Res* 1989; 64: 1224–1229
47. Katz AM. Angiotensin II: hemodynamic regulator or growth factor? *J Mol Cell Cardiol* 1990; 22: 739–747
48. Norman JT, Badie-Dezfooly B, Nord EP *et al*. EGF-induced mitogenesis in proximal tubular cells: potentiation by angiotensin II. *Am J Physiol* 1987; 253: F299–F309
49. Norman JT. The role of angiotensin II in renal growth. *Renal Physiol Biochem* 1991; 14: 175–185
50. Wolf G, Neilson EG. Angiotensin II induces cellular hypertrophy in cultured murine proximal tubular cells. *Am J Physiol* 1990; 259: F768–F777
51. Wolf G, Zahner G, Mondorf U, Schoeppe W, Stahl RAK. Angiotensin II stimulates cellular hypertrophy of LLC-PK<sub>1</sub> cells through the AT<sub>1</sub> receptor. *Nephrol Dial Transplant* 1993; 8: 128–133
52. Harris RC. Regulation of S6 kinase activity in renal proximal tubule. *Am J Physiol* 1992; 263: F127–F134
53. Weerackody RP, Chatterjee PK, Mistry SK, McLaren J, Hawksworth GM, McLay JS. Selective antagonism of the AT<sub>1</sub> receptor inhibits the effect of angiotensin II on DNA and protein synthesis of rat proximal tubular cells. *Exp Nephrol* 1997; 5: 253–262
54. Wolf G, Neilson EG. Angiotensin II as a hypertrophogenic cytokine for proximal tubular cells. *Kidney Int* 1993; 43 [Suppl. 39]: S100–S107
55. Wolf G, Killen PD, Neilson EG. Intracellular signaling of transcription and secretion of type IV collagen after angiotensin II-induced cellular hypertrophy in cultured proximal tubular cells. *Mol Cell Biol* 1991; 2: 219–227
56. Burns KD, Harris RC. Signaling and growth responses of LLC-PK<sub>1</sub>/Cl<sub>4</sub> cells transfected with the rabbit AT<sub>1</sub>ANG II-receptor. *Am J Physiol* 1995; 268: C925–C935
57. Wolf G, Kuncio GS, Sun MJ, Neilson EG. Expression of

- homeobox genes in a proximal tubular cell line derived from adult mice. *Kidney Int* 1991; 39: 1027–1033
58. Wolf G, Mueller E, Stahl RAK, Ziyadeh FN. Angiotensin II-induced hypertrophy of cultured murine proximal tubular cells is mediated by endogenous transforming growth factor- $\beta$ . *J Clin Invest* 1993; 92: 1366–1372
  59. Wolf G, Ziyadeh FN, Zahner G, Stahl RAK. Angiotensin II-stimulated expression of transforming growth factor beta in renal proximal tubular cells: attenuation after stable transfection with the *c-mas* oncogene. *Kidney Int* 1995; 48: 1818–1827
  60. Wolf G, Neilson EG. Effects of angiotensin II on proximal tubular cells stably transfected with the *c-mas* oncogene. *Am J Physiol* 1992; 263: F931–F938
  61. Rosenberg ME, Hostetter TH, Kren S, Chmielewski D. Effect of angiotensin II and norepinephrine on early growth response genes in the rat kidney. *Kidney Int* 1993; 43: 601–609
  62. Wolf G, Stahl RAK. Angiotensin II-stimulated hypertrophy of LLC-PK<sub>1</sub> cells depends on the induction of the cyclin-dependent kinase inhibitor p27<sup>Kip1</sup>. *Kidney Int* 1996; 50: 2112–2119
  63. Ling H, Vamvakas S, Schaefer L, Schnittler HJ, Schaefer RM, Heidland A. Angiotensin II-induced cell hypertrophy: potential role of impaired proteolytic activity in cultured LLC-PK<sub>1</sub> cells. *Nephrol Dial Transplant* 1995; 10: 1305–1312
  64. Wolf G, Ziyadeh FN, Helmchen U, Zahner G, Schroeder R, Stahl RAK. ANG II is a mitogen for a murine cell line isolated from medullary thick ascending limb of Henle's loop. *Am J Physiol* 1995; 268: F940–F947
  65. Wolf G, Haberstroh U, Neilson EG. Angiotensin II stimulates the proliferation and biosynthesis of type I collagen in cultured murine mesangial cells. *Am J Pathol* 1992; 140: 95–107
  66. Bakris GL, Re RN. Endothelin modulates angiotensin II-induced mitogenesis of human mesangial cells. *Am J Physiol* 1993; 264: F937–F942
  67. Moriyama T, Fujibayashi M, Fujiwara Y *et al.* Angiotensin II stimulates interleukin-6 release from cultured mouse mesangial cells. *J Am Soc Nephrol* 1995; 6: 95–101
  68. Wolthuis A, Boes A, Rodemann HP, Grond J. Vasoactive agents affect growth and protein synthesis of cultured rat mesangial cells. *Kidney Int* 1992; 41: 124–131
  69. Orth SR, Weinreich T, Bönnisch S, Weih M, Ritz E. Angiotensin II induces hypertrophy and hyperplasia in adult human mesangial cells. *Exp Nephrol* 1995; 3: 23–33
  70. Mattana J, Singhal PC. L-arginine supplementation antagonizes the effects of angiotensin II and endothelin I on mesangial cell proliferation. *Cell Physiol Biochem* 1995; 5: 176–192
  71. Ray PE, Bruggeman LA, Horikoshi S, Aguilera G, Klotman PE. Angiotensin II stimulates human fetal mesangial cell proliferation and fibronectin biosynthesis by binding to AT<sub>1</sub> receptors. *Kidney Int* 1994; 45: 177–184
  72. Gómez-Garre D, Ruiz-Ortega M, Ortego M *et al.* Effects and interactions of endothelin-1 and angiotensin II on matrix protein expression and synthesis and mesangial cell growth. *Hypertension* 1996; 27: 885–892
  73. Higuero S, Romero S. Angiotensin II requires PDGF-BB to induce DNA synthesis in rat mesangial cells cultured in an exogenous insulin-free medium. *Nephrol Dial Transplant* 1997; 12: 694–700
  74. Anderson PW, Do YS, Hsueh WA. Angiotensin II causes mesangial cell hypertrophy. *Hypertension* 1993; 21: 29–35
  75. Schulze-Lohoff E, Köhler M, Fees H, Reindl N, Sterzel RB. Divergent effects of arginine vasopressin and angiotensin II on proliferation and expression of the immediate early genes *c-fos*, *c-jun* and *EGR-1* in cultured rat glomerular mesangial cells. *J Hypertens* 1993; 11: 127–134
  76. Huwiler A, Stabel S, Fabbro D, Pfeilschifter J. Platelet-derived growth factor and angiotensin II stimulate the mitogen-activated protein kinase cascade in renal mesangial cells: comparison of hypertrophic and hyperplastic agonists. *Biochem J* 1995; 305: 777–784
  77. Johnson RJ, Alpers CE, Yoshimura A *et al.* Renal injury from angiotensin II-mediated hypertension. *Hypertension* 1992; 19: 464–474
  78. Amann K, Nichols C, Törnig J *et al.* Effect of ramipril, nifedipine, and moxonidine on glomerular morphology and podocyte structure in experimental renal failure. *Nephrol Dial Transplant* 1996; 11: 1003–1011
  79. Wolf G, Thaiss F, Schoeppe W, Stahl RAK. Angiotensin II-induced proliferation of cultured murine mesangial cells: inhibitory role of atrial natriuretic peptide. *J Am Soc Nephrol* 1992; 3: 1270–1278
  80. Wolf G, Ziyadeh FN, Stahl RAK. Atrial natriuretic peptide stimulates the expression of transforming growth factor- $\beta$  in cultured murine mesangial cells: relationship to suppression of proliferation. *J Am Soc Nephrol* 1995; 6: 224–233
  81. Maric C, Aldred GP, Antoine AM *et al.* Effects of angiotensin II on cultured rat renomedullary interstitial cells are mediated by AT<sub>1A</sub> receptors. *Am J Physiol* 1996; 271: F1020–F1028
  82. Wolf G, Ziyadeh FN, Zahner G, Stahl RAK. Angiotensin II is mitogenic for cultured rat glomerular endothelial cells. *Hypertension* 1996; 27: 897–905
  83. Egido J. Vasoactive hormones and renal sclerosis. *Kidney Int* 1996; 49: 578–597
  84. Matususaka T, Hymes J, Ichikawa I. Angiotensin in progressive renal diseases: theory and practice. *J Am Soc Nephrol* 1996; 7: 2025–2043
  85. Hilgers KF, Mann JFE. Role of angiotensin II in glomerular injury: lessons from experimental and clinical studies. *Kidney Blood Press Res* 1996; 19: 254–262
  86. Ikoma M, Kawamura T, Kakinuma Y, Fogo A, Ichikawa I. Cause of variable therapeutic efficiency of angiotensin converting enzyme inhibitors on glomerular lesions. *Kidney Int* 1991; 40: 195–202
  87. Lane PH. Furosemide treatment, angiotensin II, and renal growth and development in the rat. *Pediatric Res* 1995; 37: 747–754
  88. Tufro-McReddie A, Romano LM, Harris JM, Ferder L, Gomez RA. Angiotensin II regulates nephrogenesis and renal vascular development. *Am J Physiol* 1995; 269: F110–F115
  89. Lumbers ER. Functions of the renin-angiotensin system during development. *Clin Exp Pharm Physiol* 1995; 22: 499–505
  90. Fogo A, Yoshida Y, Yared A, Ichikawa I. Importance of angiogenic action of angiotensin II in the glomerular growth of maturing kidneys. *Kidney Int* 1990; 38: 1068–1074
  91. Hilgers KF, Reddi V, Krege JH, Smithies O, Gomez RA. Aberrant renal vascular morphology and renin expression in mutant mice lacking angiotensin-converting enzyme. *Hypertension* 1997; 29: 216–221
  92. Esther CR, Howard TE, Marino EM, Goddard JM, Capechi MR, Bernstein KE. Mice lacking angiotensin-converting enzyme have low blood pressure, renal pathology, and reduced male fertility. *Lab Invest* 1996; 74: 953–965
  93. McCausland JE, Bertram JF, Ryan GB, Alcorn D. Glomerular number and size following chronic angiotensin II blockade in the postnatal rat. *Exp Nephrol* 1997; 5: 201–209
  94. Stoll M, Steckelings M, Paul M, Bottari SP, Metzger R, Unger T. The angiotensin AT<sub>2</sub>-receptor mediates inhibition of cell proliferation in coronary endothelial cells. *J Clin Invest* 1995; 95: 651–657
  95. Yamada T, Horiuchi M, Dzau VJ. Angiotensin II type 2 receptor mediates programmed cell death. *Proc Natl Acad Sci USA* 1996; 93: 156–160
  96. Horiuchi M, Hayashida W, Kambe T, Yamada T, Dzau VJ. Angiotensin type 2 receptor dephosphorylates Bcl-2 by activating mitogen-activated protein kinase phosphatase-1 and induces apoptosis. *J Biol Chem* 1997; 272: 19022–19026
  97. Ardaillou R. Angiotensin II type II receptor. Does it have a role in the normal or diseased kidney? *Nephrol Dial Transplant* 1994; 9: 1364–1365
  98. El Nahas AM. Glomerulosclerosis: insights into the pathogenesis and treatment. *Nephrol Dial Transplant* 1989; 4: 843–853
  99. Kuncio GS, Neilson EG, Haverly T. Mechanisms of tubulointerstitial fibrosis. *Kidney Int* 1991; 39: 550–556
  100. Sharma K, Ziyadeh FN. The emerging role of transforming growth factor- $\beta$  in kidney diseases. *Am J Physiol* 1994; 35: F829–F842
  101. Kashgarian M, Sterzel RB. The pathobiology of the mesangium. *Kidney Int* 1992; 41: 524–529

102. Floege J, Burns MW, Alpers CE *et al*. Glomerular cell proliferation and PDGF expression precede glomerulosclerosis in the remnant kidney model. *Kidney Int* 1992; 41: 297–309
103. Wolf G, Neilson EG. Cellular biology of tubulointerstitial growth. *Curr Topics Pathol* 1995; 88: 69–97
104. El Nahas AM. Renal scarring: the role of angiotensin II. *Nephrol Dial Transplant* 1995; 10 [Suppl. 9]: 28–32
105. Wolf G, Zahner G, Schroeder R, Stahl RAK. Transforming growth factor beta mediates the angiotensin II-induced stimulation of collagen type IV synthesis in cultured murine proximal tubular cells. *Nephrol Dial Transplant* 1996; 11: 263–269
106. Kaneto H, Morrossey J, Klahr S. Increased expression of TGF- $\beta$ 1 mRNA in the obstructed kidney of rats with unilateral ureteral ligation. *Kidney Int* 1993; 44: 313–321
107. Pimentel JL, Sundell CL, Wang S, Kopp JB, Montero A, Martinez-Maldonado M. Role of angiotensin II in the expression and regulation of transforming growth factor- $\beta$  in obstructive nephropathy. *Kidney Int* 1995; 48: 1233–1246
108. Ishidoya S, Morrissey J, McCracken R, Klahr S. Delayed treatment with enalapril halts tubulointerstitial fibrosis in rats with obstructive nephropathy. *Kidney Int* 1996; 49: 1110–1119
109. Wolf G, Thaiss F, Stahl RAK. Cyclosporine stimulates expression of transforming growth factor- $\beta$  in renal cells. *Transplantation* 1995; 60: 237–241
110. Wolf G, Zahner G, Ziyadeh FN, Stahl RAK. Cyclosporin A induces transcription of transforming growth factor beta in a cultured murine proximal tubular cell line. *Exp Nephrol* 1996; 4: 304–308
111. Wolf G, Killen PD, Neilson EG. Cyclosporin A stimulates transcription and procollagen secretion in tubulointerstitial fibroblasts and proximal tubular cells. *J Am Soc Nephrol* 1990; 1: 918–922
112. Shehata M, Cope GH, Johnson TS, Raftery AT, El Nahas AM. Cyclosporine enhances the expression of TGF- $\beta$  in the juxtaglomerular cells of the rat kidney. *Kidney Int* 1995; 48: 1487–1496
113. Burdmann EA, Andoh TF, Nast CC *et al*. Prevention of experimental cyclosporin-induced interstitial fibrosis by losartan and enalapril. *Am J Physiol* 1995; 269: F491–F499
114. Kon V, Hunley TE, Fogo A. Combined antagonism of endothelin A/B receptors links endothelin to vasoconstriction whereas angiotensin II effects fibrosis. *Transplantation* 1995; 60: 89–95
115. Inserra F, Romano LA, de Cavanagh EMV, Ercole L, Ferder LF, Gomez RA. Renal interstitial sclerosis in aging: effects of enalapril and nifedipine. *J Am Soc Nephrol* 1996; 7: 676–680
116. Kagami S, Border WA, Miller DE, Noble NA. Angiotensin II stimulates extracellular matrix protein synthesis through induction of transforming growth factor- $\beta$  expression in rat glomerular mesangial cells. *J Clin Invest* 1994; 93: 2431–2437
117. Nahmann NS, Rothe KL, Falkenhain ME *et al*. Angiotensin II induction of fibronectin biosynthesis in cultured human mesangial cells: association with CREB transcription factor activation. *J Lab Clin Med* 1996; 127: 599–611
118. Wu LL, Cox A, Roe CJ, Dziadek M, Cooper ME, Gilbert RE. Transforming growth factor  $\beta$ 1 and renal injury following subtotal nephrectomy in the rat: role of the renin-angiotensin system. *Kidney Int* 1997; 51: 1553–1567
119. Lee SK, Jin SY, Han DC, Hwang SD, Lee HB. Effects of delayed treatment with enalapril and/or lovastatin on the progression of glomerulosclerosis in 5/6 nephrectomized rats. *Nephrol Dial Transplant* 1993; 8: 1338–1343
120. Lee LK, Meyer TW, Pollock AS, Lovett DH. Endothelial cell injury initiates glomerular sclerosis in the rat remnant kidney. *J Clin Invest* 1995; 96: 953–964
121. Kagami S, Kuhara T, Okada K, Kuroda Y, Border WA, Noble NA. Dual effects of angiotensin II on the plasminogen/plasmin system in rat mesangial cells. *Kidney Int* 1997; 51: 664–671
122. Feener EP, Xia P, Inoguchi T, Shiba T, Kunisaki M, King GL. Role of protein kinase C in glucose- and angiotensin II-induced plasminogen activator inhibitor expression. *Contrib Nephrol* 1996; 118: 180–187
123. Nguyen G, Delarue F, Berrou J, Rondeau E, Sraer JD. Specific receptor binding of renin on human mesangial cells in culture increases plasminogen activator inhibitor-1 antigen. *Kidney Int* 1996; 50: 1897–1903
124. Oikawa T, Freeman M, Lo W, Vaughan DE, Fogo A. Modulation of plasminogen activator inhibitor-1 in vivo: a new mechanism for the anti-fibrotic effect of renin-angiotensin inhibition. *Kidney Int* 1997; 51: 164–172
125. Arai M, Isaka Y, Akagi Y *et al*. In vivo transfection of genes for renin and angiotensinogen into the glomerular cells induced phenotypic change of the mesangial cells and glomerular sclerosis. *Biochem Biophys Res Commun* 1995; 206: 525–532
126. Van Goor H, Ding G, Kees-Folts D, Grond J, Schreiner GF, Diamond JR. Macrophages and renal disease. *Lab Invest* 1994; 71: 456–464
127. Diamond JR, Anderson S. Irreversible tubulointerstitial damage associated with chronic aminonucleoside nephrosis. Amelioration by angiotensin I converting enzyme inhibition. *Am J Pathol* 1990; 137: 1323–1332
128. Eng E, Veniant M, Floege J *et al*. Renal proliferative and phenotypic changes in rats with two-kidney, one-clip Goldblatt hypertension. *Am J Hypertens* 1994; 7: 177–185
129. Mai M, Geiger H, Hilgers KF *et al*. Early interstitial changes in hypertension-induced renal injury. *Hypertension* 1993; 22: 754–765
130. Geiger H, Fierlbeck W, Mai M *et al*. Effects of early and late antihypertensive treatment on extracellular matrix proteins and mononuclear cells in uninephrectomized SHR. *Kidney Int* 1997; 51: 750–761
131. Goetzl EJ, Klickstein LB, Watt KWK, Wintroub BU. The preferential human mononuclear leukocyte chemotactic activity of the substituent tetrapeptides of angiotensin II. *Biochem Biophys Res Commun* 1980; 97: 1097–1102
132. Weinstock JV, Kassab JT. Angiotensin II stimulation of granuloma macrophage phagocytosis and actin polymerization in murine schistosomiasis mansoni. *Cell Immunol* 1984; 89: 46–54
133. Farber HW, Center DM, Rounds S, Danilov. Components of the angiotensin system cause release of a neutrophil chemoattractant from cultured bovine and human endothelial cells. *Eur Heart J* 1990; 11 [Suppl. B]: 100–107
134. Ai Kim J, Berliner JA, Nadler JL. Angiotensin II increases monocyte binding to endothelial cells. *Biochem Biophys Res Commun* 1996; 226: 862–868
135. Wolf G, Ziyadeh FN, Thaiss F *et al*. Angiotensin II stimulates expression of the chemokine RANTES in rat glomerular endothelial cells. Role of the angiotensin type 2 receptor. *J Clin Invest* 1997; 100: 1047–1058
136. Ruiz-Ortega M, Bustos C, Egido J. Angiotensin II triggers monocyte chemoattractant protein-1 (MCP-1), transforming growth factor (TGF- $\beta$ 1) and matrix protein gene expression in mesangial cells and interstitial renal fibroblasts (abstract). *Nephrol Dial Transplant* 1996; 11: A58
137. Kim YS, Bhandari B, Abboud HE. Angiotensin II (ANG II) stimulates monocyte chemoattractant protein-1 (MCP-1) expression in rat mesangial cells (abstract). *J Am Soc Nephrol* 1996; 7: 1737
138. Satriano JA, Shuldiner M, Hora K, Xing Y, Shan Z, Schlöndorff D. Oxygen radicals as second messengers for expression of the monocyte chemoattractant protein, JE/MCP-1, and the monocyte colony-stimulating factor, CSF-1, in response to tumor necrosis factor-alpha and immunoglobulin G: evidence for involvement of reduced nicotinamide adenine dinucleotide phosphate (NADPH)-dependent oxidase. *J Clin Invest* 1993; 92: 1564–1571
139. Ushio-Fukai M, Zafari AM, Fukui T, Ishizaka N, Griendling KK. p22<sup>phox</sup> is a critical component of the superoxide-generating NADH/NADPH oxidase system and regulates angiotensin II-induced hypertrophy in vascular smooth muscle cells. *J Biol Chem* 1996; 271: 23317–23321
140. Wolf G, Ziyadeh FN, Schroeder R, Stahl RAK. Angiotensin II inhibits inducible nitric oxide synthase in tubular MCT cells by a posttranscriptional mechanism. *J Am Soc Nephrol* 1997; 8: 551–557
141. Matthews JR, Botting CH, Panico M, Morris HR, Hay RT. Inhibition of NF- $\kappa$ B DNA binding by nitric oxide. *Nucl Acids Res* 1996; 24: 2236–2242

142. Wolf G, Schneider A, Helmchen U, Stahl RAK. Angiotensin II-receptor antagonists abolish glomerular MCP-I expression in a model of mesangialproliferative glomerulonephritis (abstract). *Nieren Hochdruckkrankh* 1997; 26: 458–459
143. Scherberich JE, Wolf G, Albers C, Nowack A, Stuckhardt C, Schoeppe W. Glomerular and tubular membrane antigens reflecting cellular adaptation in human renal failure. *Kidney Int* 1989; 36 [Suppl. 27]: S38–S51
144. Chobanian MC, Julin CM. Angiotensin II stimulates ammoniogenesis in canine renal proximal tubule segments. *Am J Physiol* 1991; 260: F19–F26
145. Nath KA, Hostetter MK, Hostetter TH. Pathophysiology of chronic tubulointerstitial disease in rats: interactions of dietary acid load, ammonia, and complement component C3. *J Clin Invest* 1985; 76: 667–675
146. Giachelli CM, Pichler R, Lombardi D *et al.* Osteopontin expression in angiotensin II-induced tubulointerstitial nephritis. *Kidney Int* 1994; 45: 515–524
147. Iwai N, Inagami I, Ohmichi N, Kinoshita M. Renin is expressed in rat macrophagelmonocyte cells. *Hypertension* 1996; 27: 399–403
148. Kitazono T, Padgett RC, Armstrong ML, Tompkins PK, Heistad DD. Evidence that angiotensin II is present in human monocytes. *Circulation* 1995; 91: 1129–1134
149. Vance BA, Kelly CJ. A nephritogenic T cell clone expresses components of the renin–angiotensin system and is responsive to angiotensin II (abstract). *J Am Soc Nephrol* 1994; 5: 772A
150. Parving HH, Hommel E, Smidt EM. Protection of kidney function and decrease in albuminuria by captopril in insulin dependent diabetics with nephropathy. *Br Med J* 1988; 297: 1086–1091
151. Marre M, Chatellier G, Leblanc H, Guyene TT, Menard J, Passa P. Prevention of diabetic nephropathy with enalapril in normotensive diabetics with microalbuminuria. *Br Med J* 1988; 297: 1092–1095
152. Björck S, Mulec H, Johnson SA, Norden G, Aurell M. Renal protective effect of enalapril in diabetic nephropathy. *Br Med J* 1992; 304: 339–343
153. The EUCLID study Group. Randomised placebo-controlled trial of lisinopril in normotensive patients with insulin-dependent diabetes and normoalbuminuria or microalbuminuria. *Lancet* 1997; 349: 1787–1792
154. Bakris GL. Angiotensin-converting enzyme inhibitors and progression of diabetic nephropathy. *Ann Intern Med* 1993; 118: 643–644
155. Romero R, Salinas I, Lucas A *et al.* Renal function changes in microalbuminuric normotensive type II diabetic patients with angiotensin-converting enzyme inhibitors. *Diabetes Care* 1993 16: 597–600
156. Lewis EJ, Hunsicker LG, Bain RP, Rohde RD. The effect of angiotensin-converting-enzyme inhibition on diabetic nephropathy. *N Engl J Med* 1993 329: 1456–1462
157. Kamper AL, Strandgaard S, Leyssac PP. Effect of enalapril on the progression of chronic renal failure. *Am J Hypertens* 1992; 5: 423–430
158. The GISEN group. Randomised placebo-controlled trial of effects of ramipril on decline in glomerular filtration rate and risk of terminal renal failure in proteinuric, non-diabetic nephropathy. *Lancet* 1997; 349: 1857–1863
159. Navis G, de Zeeuw O, de Jong PE. Commentary. ACE-inhibitors: panacea for progressive renal disease? *Lancet* 1997; 349: 1852–1853
160. Geiger H. Are angiotensin II receptor blockers superior to angiotensin converting enzyme inhibitors with regard to their renoprotective effect? *Nephrol Dial Transplant* 1997; 12: 640–642
161. Ichikawa I. Will angiotensin II receptor antagonists be renoprotective in humans? *Kidney Int* 1996; 50: 684–692
162. Johnston CI. Angiotensin receptor antagonists: focus on losartan. *Lancet* 1995; 346: 1403–1407
163. Ziai F, Ots M, Provoost AP *et al.* The angiotensin receptor antagonist, irbesartan, reduces renal injury in experimental chronic renal failure. *Kidney Int* 1996; 50 [Suppl. 57]: S132–S136
164. Pollock DM, Divish BJ, Polakowski JS, Opgenorth TJ. Angiotensin II receptor blockade improves renal function in rats with reduced renal mass. *J Pharmacol Exp Ther* 1993; 267: 657–663
165. Remuzzi A, Perico N, Amuchastegui CS *et al.* Short- and long-term effect of angiotensin II receptor blockade in rats with experimental diabetes. *J Am Soc Nephrol* 1993; 4: 40–49
166. Shibouta Y, Chatani F, Ishimura Y *et al.* TC-116 inhibits renal interstitial and glomerular injury in glomerulosclerotic rats. *Kidney Int* 1996; 49 [Suppl. 55]: S115–S118
167. Fox AJ, Lalloo UG, Belvisi MG, Bernareggi M, Chung KF, Barnes PJ. Bradykinin-evoked sensitization of airway sensory nerves: a mechanism for ACE-inhibitor cough. *Nature Med* 1996; 2: 814–817
168. Pitt B, Segal R, Martinez FA *et al.* Randomised trial of losartan versus captopril in patients over 65 with heart failure (evaluation of losartan in the elderly study, ELITE). *Lancet* 1997; 349: 747–752
169. Harris RC, Kondo S, Yasuda T. Mechanical stress–cell function relationships in renal cells. *Exp Nephrol* 1997; 5: 263–270
